# Supplementary material
Source: Royal Society of Chemistry journal article supplement (doi:10.1039/d5cp04997k)
Supplement: d5cp04997k1.pdf [file d5cp04997k1.pdf]

# Stoichiometric Dependence on Structural and Electronic Properties of $\text{HfX}_{2(1-x)}\text{X}_{2x}$ ( $\text{X}=\text{S}, \text{Se}, \text{Te}$ ) monolayers<sup>†</sup>

Vivek Mahajan<sup>1\*</sup>, and Hitesh Sharma<sup>1,2</sup>

<sup>1</sup>*Department of Physics, I.K. G Punjab Technical University, Kapurthala,  
Punjab, India*

<sup>2</sup>*National Institute of Technology, Delhi, India*

*E-mail: [vivekk.mahajann@gmail.com](mailto:vivekk.mahajann@gmail.com), and [hitesh@ptu.ac.in](mailto:hitesh@ptu.ac.in)*

## Supporting Information Available

### Calculating phonon frequencies of $\text{HfX}_2$ .

In this section, the phonon frequency of  $\text{HfX}_2$  monolayers has been calculated, and atom-wise numbering on the supercell is shown.

The above plot shows that  $\text{HfS}_2$  and  $\text{HfSe}_2$  monolayers are thermally stable, whereas  $\text{HfTe}_2$  is unstable due to the presence of negative imaginary frequencies.

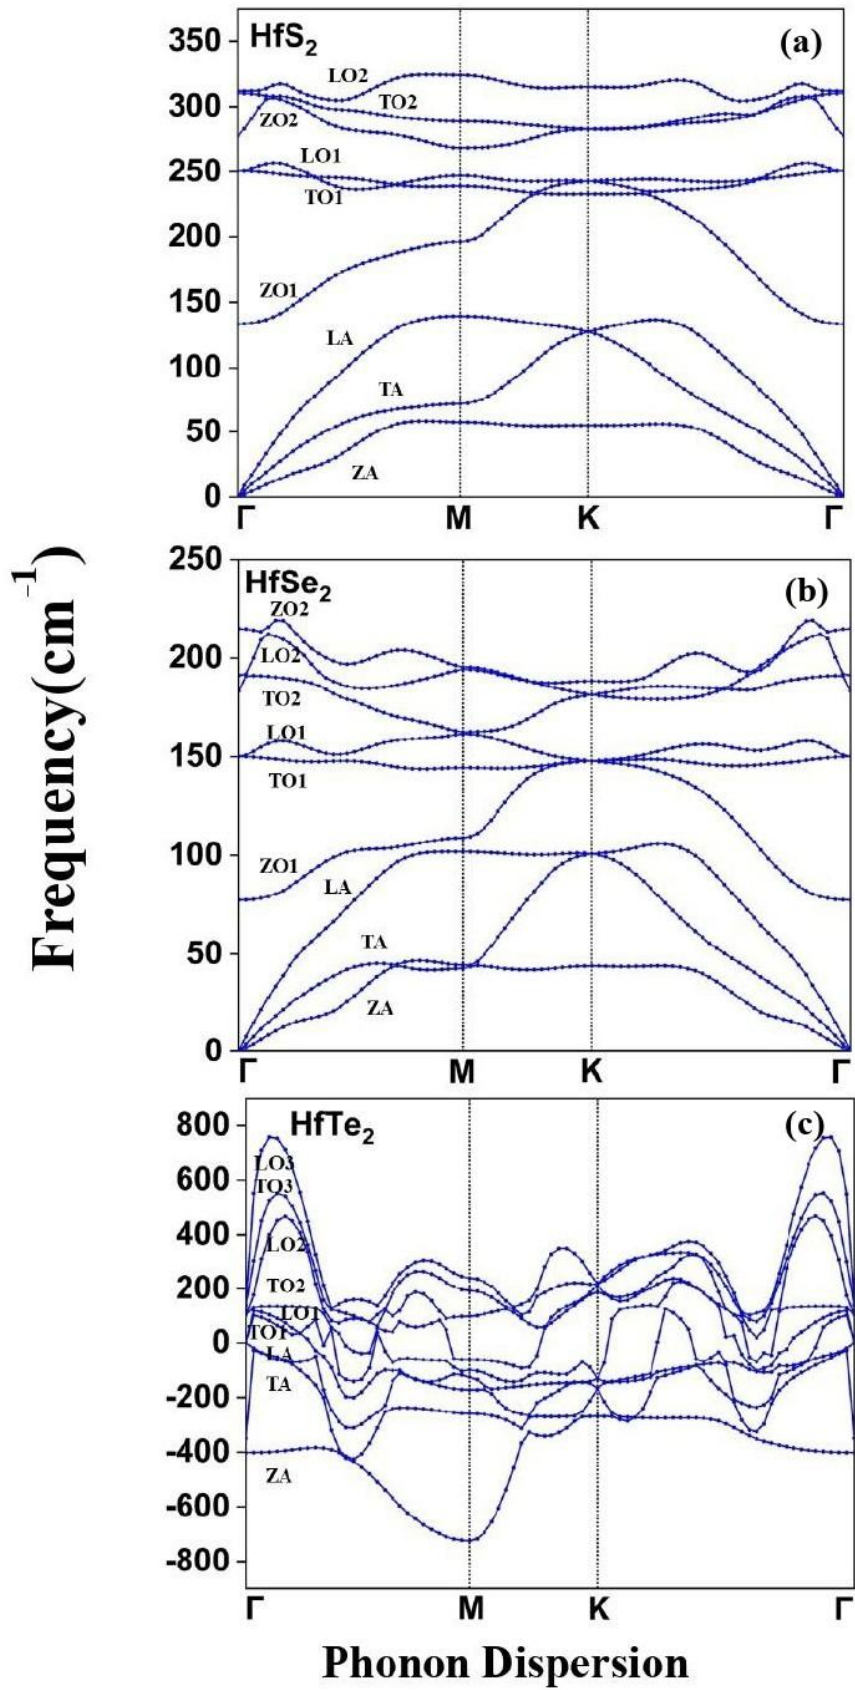

Figure S1: Phonon dispersion plot of HfX<sub>2</sub> (X=S, Se, Te) monolayers.

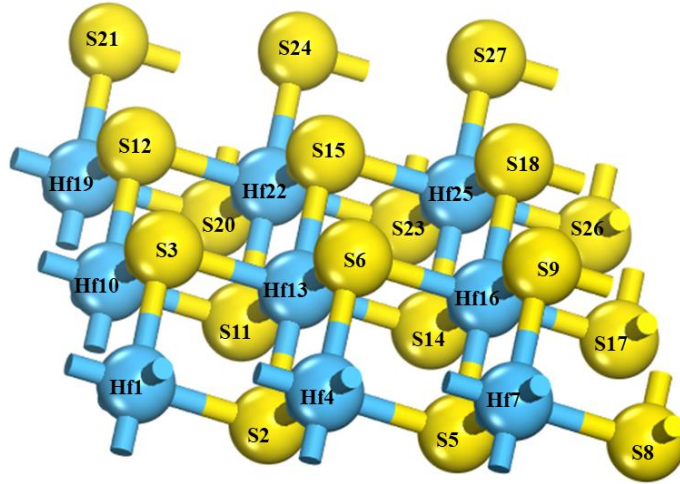

Figure S2: Atom-wise numbering on  $\text{HfX}_{2(1-x)}\text{X}_{2x}$  ( $X=\text{S, Se, Te}$ ) systems.

### Effect of SOC in Hf-alloy.

In this section, the tabular data of Hf-alloy are compared with the PBE and PBE+SOC functional. Also, the relativistic effect has been investigated at the  $\Gamma$  point.

Table S1: Tabular data of the calculated electronic band gap of  $\text{HfX}_{2(1-x)}\text{X}_{2x}$  ( $X=\text{S, Se, Te}$ ) systems by making a comparison between the PBE and PBE+SOC functional.

| S. No | Number of doped atoms | Calculated $E_{\text{gap}}$ (eV) |         |                |         |
|-------|-----------------------|----------------------------------|---------|----------------|---------|
|       |                       | For $\text{HfS}_2$               |         |                |         |
|       |                       | With Se doping                   |         | With Te doping |         |
|       |                       | PBE                              | PBE+SOC | PBE            | PBE+SOC |
| 1.    | Pure                  | 1.26                             | 1.26    | 1.26           | 1.26    |
| 2.    | 2                     | 1.11                             | 1.11    | 0.65           | 0.65    |
| 3.    | 4                     | 0.98                             | 0.98    | 0.45           | 0.45    |
| 4.    | 6                     | 0.84                             | 0.84    | 0.00           | 0.00    |
| 5.    | 8                     | 0.77                             | 0.77    | 0.00           | 0.00    |
|       |                       | For $\text{HfSe}_2$              |         |                |         |
|       |                       | With S doping                    |         | With Te doping |         |
|       |                       | PBE                              | PBE+SOC | PBE            | PBE+SOC |
| 1.    | Pure                  | 0.55                             | 0.55    | 0.55           | 0.55    |
| 2.    | 2                     | 0.51                             | 0.51    | 0.24           | 0.24    |
| 3.    | 4                     | 0.57                             | 0.57    | 0.12           | 0.12    |
| 4.    | 6                     | 0.73                             | 0.73    | 0.00           | 0.00    |
| 5.    | 8                     | 0.70                             | 0.70    | 0.00           | 0.00    |
|       |                       | For $\text{HfTe}_2$              |         |                |         |
|       |                       | With S doping                    |         | With Te doping |         |
|       |                       | PBE                              | PBE+SOC | PBE            | PBE+SOC |

|    |      |      |      |      |      |
|----|------|------|------|------|------|
| 1. | Pure | 0.00 | 0.00 | 0.00 | 0.00 |
| 2. | 2    | 0.00 | 0.00 | 0.00 | 0.00 |
| 3. | 4    | 0.00 | 0.00 | 0.00 | 0.00 |
| 4. | 6    | 0.00 | 0.00 | 0.00 | 0.00 |
| 5. | 8    | 0.00 | 0.00 | 0.00 | 0.00 |

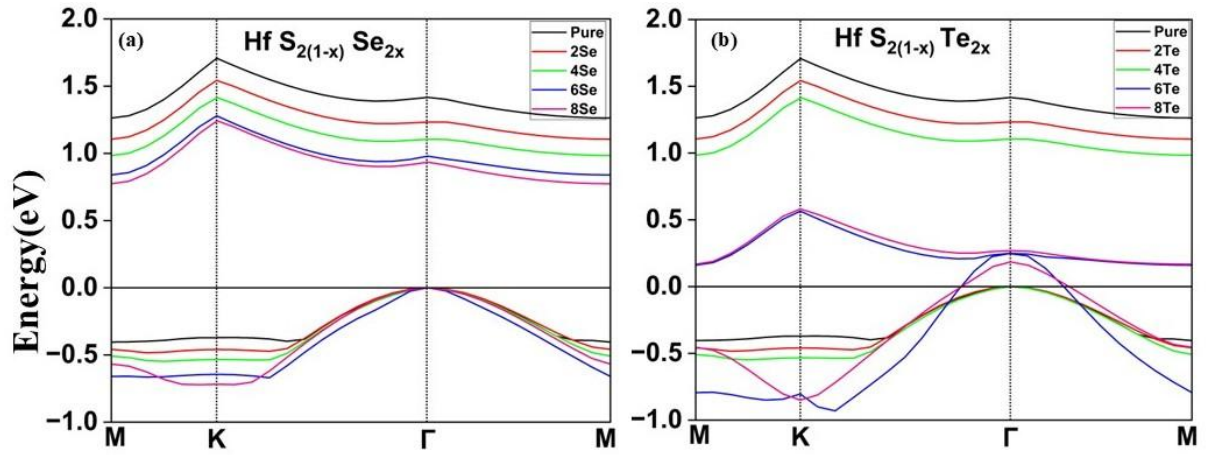

Figure S3: (a) and (b) show the electronic band structure plots of  $\text{HfS}_{2(1-x)}\text{Se}_{2x}$ , and  $\text{HfS}_{2(1-x)}\text{Te}_{2x}$  systems with varied doping atom concentrations using the PBE+SOC functional at the  $\Gamma$  point.

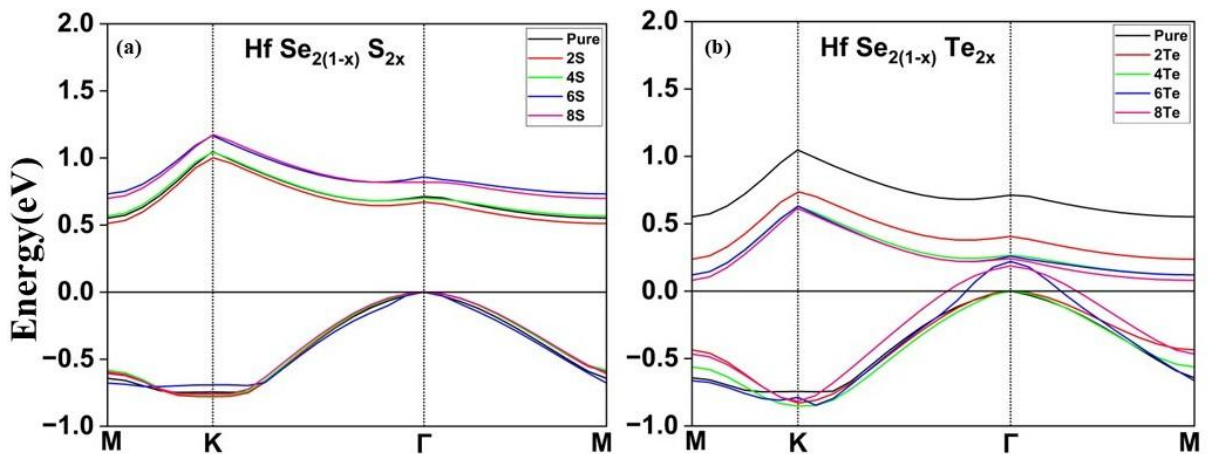

Figure S4: (a) and (b) show the electronic band structure plots of  $\text{HfSe}_{2(1-x)}\text{S}_{2x}$ , and  $\text{HfSe}_{2(1-x)}\text{Te}_{2x}$  systems with varied doping atom concentrations using the PBE+SOC functional at the  $\Gamma$  point.

## Tabular data of the effective mass of Hf-alloy

Table S2: Effective mass ( $m^*$ ) of HfS<sub>2</sub>, doped HfS<sub>2(1-x)</sub>Se<sub>2x</sub> and HfSe<sub>2(1-x)</sub>S<sub>2x</sub>, and HfSe<sub>2</sub> systems.

| S. No | S    | Se   | Effective Mass ( $m^*$ ) |       |
|-------|------|------|--------------------------|-------|
|       |      |      | $m_e$                    | $m_h$ |
| 1     | 1    | 0    | -0.02                    | 0.02  |
| 2     | 0.89 | 0.11 | -0.02                    | 0.02  |
| 3     | 0.78 | 0.22 | -0.02                    | 0.02  |
| 4     | 0.67 | 0.33 | -0.02                    | 0.02  |
| 5     | 0.56 | 0.44 | -0.02                    | 0.02  |
| 6     | 0.44 | 0.56 | -0.02                    | 0.02  |
| 7     | 0.33 | 0.67 | -0.02                    | 0.02  |
| 8     | 0.22 | 0.78 | -0.02                    | 0.03  |
| 9     | 0.11 | 0.89 | -0.02                    | 0.01  |
| 10    | 0    | 1    | -0.02                    | 0.01  |

Table S3: Effective mass ( $m^*$ ) of HfS<sub>2</sub>, doped HfS<sub>2(1-x)</sub>Te<sub>2x</sub> and HfTe<sub>2(1-x)</sub>S<sub>2x</sub>, and HfTe<sub>2</sub> systems.

| S. No | S    | Te   | Effective Mass ( $m^*$ ) |       |
|-------|------|------|--------------------------|-------|
|       |      |      | $m_e$                    | $m_h$ |
| 1     | 1    | 0    | -0.02                    | 0.02  |
| 2     | 0.89 | 0.11 | -0.04                    | 0.02  |
| 3     | 0.78 | 0.22 | -0.02                    | 0.02  |
| 4     | 0.67 | 0.33 | -0.01                    | 0.01  |
| 5     | 0.56 | 0.44 | -0.02                    | 0.04  |
| 6     | 0.44 | 0.56 | -0.03                    | 0.02  |
| 7     | 0.33 | 0.67 | -0.03                    | 0.04  |
| 8     | 0.22 | 0.78 | -0.02                    | 0.04  |
| 9     | 0.11 | 0.89 | -0.02                    | 0.04  |
| 10    | 0    | 1    | -0.02                    | 0.02  |

Table S4: Effective mass ( $m^*$ ) of HfSe<sub>2</sub>, doped HfSe<sub>2(1-x)</sub>S<sub>2x</sub> and HfTe<sub>2(1-x)</sub>Se<sub>2x</sub>, and HfTe<sub>2</sub> systems.

| S. No | Se   | Te   | Effective Mass ( $m^*$ ) |       |
|-------|------|------|--------------------------|-------|
|       |      |      | $m_e$                    | $m_h$ |
| 1     | 1    | 0    | -0.02                    | 0.01  |
| 2     | 0.89 | 0.11 | -0.01                    | 0.02  |
| 3     | 0.78 | 0.22 | -0.01                    | 0.02  |
| 4     | 0.67 | 0.33 | -0.03                    | 0.02  |
| 5     | 0.56 | 0.44 | -0.02                    | 0.02  |
| 6     | 0.44 | 0.56 | -0.02                    | 0.02  |
| 7     | 0.33 | 0.67 | -0.02                    | 0.02  |
| 8     | 0.22 | 0.78 | -0.02                    | 0.02  |
| 9     | 0.11 | 0.89 | -0.03                    | 0.04  |
| 10    | 0    | 1    | -0.02                    | 0.02  |
